# Supplementary material for: Multicomponent chiral hydrogel fibers with block configurations based on the chiral liquid crystals of cellulose nanocrystals and M13 bacteriophages
Source: Royal Society of Chemistry journal article supplement (doi:10.1039/d2py00965j), 2022-01-01
Supplement: d2py00965j1.pdf [file d2py00965j1.pdf]

# Electronic Supplementary Information for Multicomponent Chiral Hydrogel Fibers with Block Configurations Based on the Chiral Liquid Crystals of Cellulose Nanocrystals and M13 Bacteriophages

Yuhan Wang<sup>1, #</sup>, Xiaonan Zheng<sup>1, #</sup>, Weiting Zhong<sup>1</sup>, Zihan Ye<sup>1</sup>, Xinzhi Wang<sup>1</sup>, Ziyue Dong<sup>1</sup>,  
Zhenkun Zhang<sup>1, \*</sup>

1) Key Laboratory of Functional Polymer Materials of Ministry of Education, Institute of Polymer  
Chemistry, College of Chemistry, Nankai University, 300071 Tianjin, China

Email: zkzhang@nankai.edu.cn

# Equal contribution

## Supplementary Figures and videos

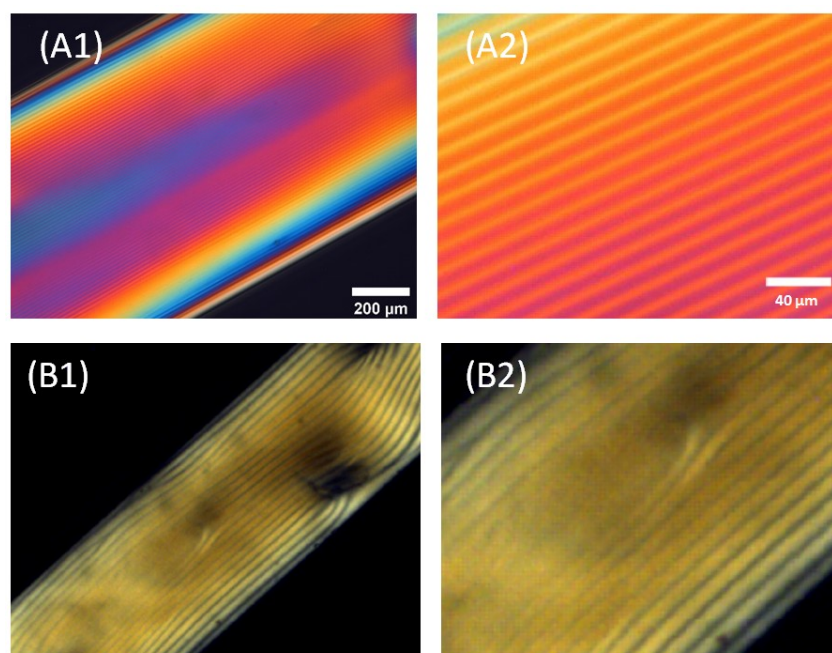

**Figure S1.** The CLC phases of CNC (A) and M13 (B) in the glass capillaries. The CNC suspension contains 7 wt% of CNC in pure water. The virus concentration in the M13 virus suspension is 45 mg mL<sup>-1</sup>.

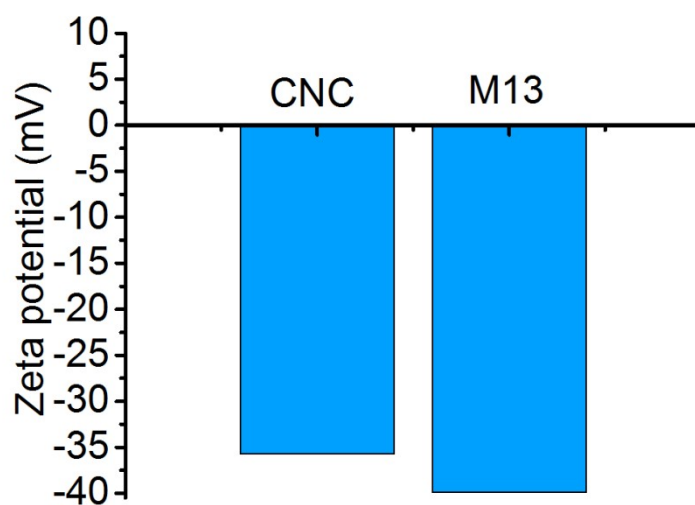

**Figure S2.** The zeta potentials of CNC and the M13 virus were measured on a BeNano 90 Zeta (Bettersize Instruments Ltd., Dandong, China).

**Video S1:** Stretching and releasing by tweezers of a chiral hydrogel fiber with a triblock CNC-M13-CNC configuration (Movie S1\_CNC-M13-CNC-1). The video was recorded between two cross polarizers.

**Video S2:** Stretching by tweezers of a chiral hydrogel fiber with a diblock CNC-M13D configuration. The M13 based block was fabricated from M13 modified with double bonds (Movie S2\_CNC block stretched more). The video was recorded between two cross polarizers.

**Video S3:** Stretching by the universal testing machine of a chiral hydrogel fiber with a diblock CNC-M13 configuration (Movie S3\_M13 block stretched more-1). The video was recorded between two cross polarizers.
